# Supplementary material for: Combined impacts of climate and land-use change on future water resources in Africa
Source: Copernicus journal article supplement (doi:10.5194/hess-28-117-2024), 2024-01-08
Supplement: Supplementary file 1 [file hess-28-117-2024-supplement.pdf]

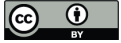

*Supplement of*

## **Combined impacts of climate and land-use change on future water resources in Africa**

**Celray James Chawanda et al.**

*Correspondence to:* Celray James Chawanda (celray.chawanda@vub.be)

The copyright of individual parts of the supplement might differ from the article licence.

# Supplementary Material.

## A. Figures.

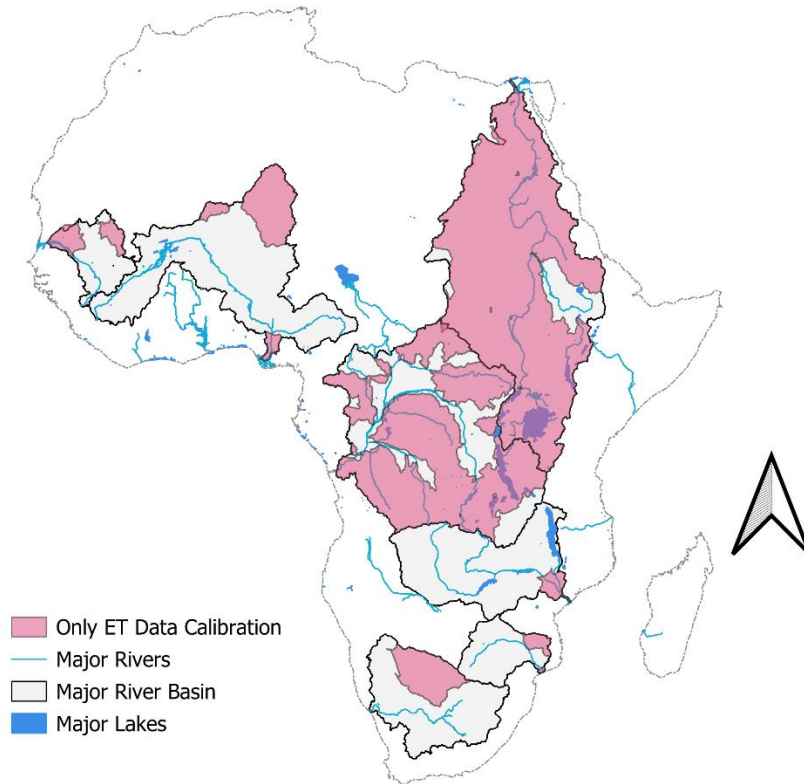

**Figure S1: A highlight of areas within major river basins where Hydrological Mass balance (HMBC) only used Evapotranspiration (ET) Soft Data.**
